# Supplementary material for: Development and comparison of novel multiple cross displacement amplification (MCDA) assays with other nucleic acid amplification methods for SARS-CoV-2 detection
Source: PubMed Central journal article supplement (PMC7819982; doi:10.1038/s41598-021-81518-8), 2021-01-21
Supplement: 41598_2021_81518_MOESM1_ESM.pdf [file 41598_2021_81518_MOESM1_ESM.pdf]

## Development and comparison of novel multiple cross displacement amplification (MCDA) assays with other nucleic acid amplification methods for SARS-CoV-2 detection

Laurence Don Wai Luu, Michael Payne, Xiaomei Zhang, Lijuan Luo and Ruiting Lan

**Supplementary Table 1:** List of MCDA, LAMP and rt-PCR primers used in this study. Bolded MCDA primer names are primers shared between 2 or more primer sets. \* indicate primers used in rt-PCR for confirmation of complete DNA removal from transcribed RNA. Red text indicates the final primer sets chosen for the MCDA SARS-CoV-2 assay.

| MCDA Primer name                    | Sequence 5' --> 3'                             | Reference  |
|-------------------------------------|------------------------------------------------|------------|
| <b>Region 1 ORF1ab primer set 1</b> |                                                |            |
| R1_1_F1*                            | CTCATGTGGGCGAAATACC                            |            |
| R1_1_2_F2                           | ATCGACATAGCGAGTGTATG                           |            |
| R1_1_2_C1                           | TTTAGATCGGCGCCGTAACATAG                        |            |
| R1_1_2_C2                           | AAGAAAACCTGGAACACTAAACATAGC                    |            |
| R1_1_2_D1                           | CACCAGCTCCTTATTACCG                            | This study |
| R1_1_D2                             | AGTGGTGTACCCTGAACT                             |            |
| R1_1_4_R1*                          | TCGTCGCCTAAGTCAAATGAC                          |            |
| R1_1_2_R2                           | TTGGCACTGATCCTTATGAAG                          |            |
| R1_1_2_CP1                          | TTTAGATCGGCGCCGTAACATAGGGCAAGTTCTTCTTCGTAAG*   |            |
| R1_1_CP2                            | AGAAAACCTGGAACACTAAACATAGCCTCCGTTAAGCTCACGCAT  |            |
| <b>Region 1 ORF1ab primer set 2</b> |                                                |            |
| R1_2_F1                             | ATGTGGGCGAAATACCAGTG                           |            |
| R1_1_2_F2                           | ATCGACATAGCGAGTGTATG                           |            |
| R1_1_2_C1                           | TTTAGATCGGCGCCGTAACATAG                        |            |
| R1_1_2_C2                           | AAGAAAACCTGGAACACTAAACATAGC                    |            |
| R1_1_2_D1                           | CACCAGCTCCTTATTACCG                            | This study |
| R1_2_D2                             | GTGGTGTACCCTGAACT                              |            |
| R1_2_R1                             | CGTCGCCTAAGTCAAATGAC                           |            |
| R1_1_2_R2                           | TTGGCACTGATCCTTATGAAG                          |            |
| R1_1_2_CP1                          | TTTAGATCGGCGCCGTAACATAGGGCAAGTTCTTCTTCGTAAG*   |            |
| R1_2_CP2                            | AGAAAACCTGGAACACTAAACATAGCCTCCGTTAAGCTCACGCAT  |            |
| <b>Region 1 ORF1ab primer set 3</b> |                                                |            |
| R1_3_F1                             | TTATGGTTGAGCTGGTAGC                            |            |
| R1_3_4_F2                           | TGTTATCGACATAGCGAGTGTATG                       |            |
| R1_3_C1                             | GCTCCTTATTACCGTTCTTACGAAG                      |            |
| R1_3_C2                             | TTGGCACTGATCCTTATGAAGATTTTC                    |            |
| R1_3_D1                             | ACTGGTATTTCGCCACATGA                           | This study |
| R1_3_D2                             | CTGGAACACTAAACATAGCAGTG                        |            |
| R1_3_R1                             | ATCGGCGCCGTAACATAGGCGCA                        |            |
| R1_3_R2                             | TCATTTGACTTAGGCGACGA                           |            |
| R1_3_CP1                            | CTCCTTTATTACCGTTCTTACGAAGAGAACTCGAAGGCATTTCAGT |            |
| R1_3_CP2                            | TTGGCACTGATCCTTATGAAGATTTTCCTCCGTTAAGCTCACGCAT |            |
| <b>Region 1 ORF1ab primer set 4</b> |                                                |            |
| R1_4_F1                             | AGAACTCGAAGGCATTTCAGTA                         |            |
| R1_3_4_F2                           | TGTTATCGACATAGCGAGTGTATG                       |            |
| R1_4_C1                             | TTAGATCGGCGCCGTAACATAG                         |            |
| R1_4_C2                             | CAAGAAAACCTGGAACACTAAACATAG                    |            |
| R1_4_D1                             | CTTACGAAGAAGAACCCTTGC                          | This study |
| R1_4_D2                             | CAGTGGTGTACCCTGAACT                            |            |
| R1_1_4_R1                           | TCGTCGCCTAAGTCAAATGAC                          |            |
| R1_4_R2                             | TTGGCACTGATCCTTATGAAGAT                        |            |
| R1_4_CP1                            | TTAGATCGGCGCCGTAACATAGGCTCATGTGGGCGAAATACCAG*  |            |
| R1_4_CP2                            | AGAAAACCTGGAACACTAAACATAGCCTCCGTTAAGCTCACGCAT  |            |
| <b>Region 2 ORF1ab primer set 1</b> |                                                |            |
| R2_1_2_F1*                          | CCACAGTACGTCTACAAGC                            |            |
| R2_1_2_F2                           | TATGTGGCAACGGCAGTAC                            |            |
| R2_1_C1                             | GTAAGCTTTAGCAGCATCTACAGC                       |            |
| R2_1_3_4_C2                         | TGGTCAGGCAATAACAGTTACACC                       |            |
| R2_1_2_D1                           | GCACAGAAAGATAATACAGTTG                         | This study |
| R2_1_2_D2                           | AAGCCAATATGGATCAAGAATC                         |            |
| R2_1_R1*                            | AGTGATTGGTTGTCCCCAC                            |            |
| R2_1_R2                             | AGATGTTGTGTACACACTG                            |            |
| R2_1_CP1                            | TTAAGCTTTAGCAGCATCTACAGCTAATGCAACAGAAGTGCCTG   |            |
| R2_1_CP2                            | TGGTCAGGCAATAACAGTTACACCAGACAACACGATGCACCACC   |            |

**Region 2 ORF1ab primer set 2**

|           |                                              |            |
|-----------|----------------------------------------------|------------|
| R2_1_2_F1 | CCACAGTACGTCTACAAGC                          |            |
| R2_1_2_F2 | TATGTGGCAACGGCAGTAC                          |            |
| R2_2_C1   | CTTTGTAAGCTTTAGCAGCATCTAC                    |            |
| R2_2_C2   | GGTCAGGCAATAACAGTTACACCG                     |            |
| R2_1_2_D1 | GCACAGAAAGATAATACAGTTG                       | This study |
| R2_1_2_D2 | AAGCCAATATGGATCAAGAATC                       |            |
| R2_2_R1   | CAATTAGTGATTGGTTGTCC                         |            |
| R2_2_R2   | GATGTTGTGTACACACACTGG                        |            |
| R2_2_CP1  | TTTGTAAGCTTTAGCAGCATCTACGTAATGCAACAGAAGTGCCT |            |
| R2_2_CP2  | GGTCAGGCAATAACAGTTACACCGAGACAACACGATGCACCACC |            |

**Region 2 ORF1ab primer set 3**

|             |                                             |            |
|-------------|---------------------------------------------|------------|
| R2_3_F1     | AGTTTAGCTGCCACAGTACGTC                      |            |
| R2_3_4_F2   | CTATGTGGCAACGGCAGTACA                       |            |
| R2_3_C1     | GTAAGCTTTAGCAGCATCTACAGCAA                  |            |
| R2_1_3_4_C2 | TGGTCAGGCAATAACAGTTACACC                    |            |
| R2_3_D1     | GCACAGAAAGATAATACAGTTGAAT                   | This study |
| R2_3_4_D2   | GGAAGCCAATATGGATCAAGAA                      |            |
| R2_3_4_R1   | ACACAATTAGTGATTGGTTGTCC                     |            |
| R2_3_R2     | AGATGTTGTGTACACACACTGGT                     |            |
| R2_3_CP1    | AGCTTTAGCAGCATCTACAGCAAGGTAATGCAACAGAAGTGCC |            |
| R2_3_4_CP2  | GGTCAGGCAATAACAGTTACACCGACAACACGATGCACCACCA |            |

**Region 2 ORF1ab primer set 4**

|             |                                              |            |
|-------------|----------------------------------------------|------------|
| R2_4_F1     | CCTAAATAGAGGTATGGTACTT                       |            |
| R2_3_4_F2   | CTATGTGGCAACGGCAGTACA                        |            |
| R2_4_C1     | TGTAAGCTTTAGCAGCATCTACAGCA                   |            |
| R2_1_3_4_C2 | TGGTCAGGCAATAACAGTTACACC                     |            |
| R2_4_D1     | GCAGGCACCTCTGTTGCATTACC                      | This study |
| R2_3_4_D2   | GGAAGCCAATATGGATCAAGAA                       |            |
| R2_3_4_R1   | ACACAATTAGTGATTGGTTGTCC                      |            |
| R2_4_R2     | TAAGATGTTGTGTACACACACTG                      |            |
| R2_4_CP1    | TAAGCTTTAGCAGCATCTACAGCAAGTTTAGCTGCCACAGTACG |            |
| R2_3_4_CP2  | GGTCAGGCAATAACAGTTACACCGACAACACGATGCACCACCA  |            |

**Region 3 N gene primer set 1**

|          |                                               |            |
|----------|-----------------------------------------------|------------|
| R3_1_F1* | AGAATGGAGAACGCAGTGG                           |            |
| R3_1_F2  | AAATACCATCTGGACTGAG                           |            |
| R3_1_C1  | TGCCATGTTGAGTGAGAGCGGTG                       |            |
| R3_1_C2  | TAGCAGTCCAGATGACCAAATTGG                      |            |
| R3_1_D1  | AACCAAGACGCAGTATTATTG                         | This study |
| R3_1_D2  | CTACCGAAGAGCTACCAGAC                          |            |
| R3_1_R1* | CCTCGAGGGAATTTAAGGTC                          |            |
| R3_1_R2  | AAGGCGTTCCAATTAACACC                          |            |
| R3_1_CP1 | TGCCATGTTGAGTGAGAGCGGTGAAACAACGTCGGCCCAAGG    |            |
| R3_1_CP2 | TAGCAGTCCAGATGACCAAATTGGTACCGTCACCACCACGAATTC |            |

**Region 3 N gene primer set 2**

|           |                                               |            |
|-----------|-----------------------------------------------|------------|
| R3_2_F1   | AAACAACGTCGGCCCAAG                            |            |
| R3_2_F2   | TGGCCAGTTCCTAGGTAG                            |            |
| R3_2_C1   | TTGTCTCGAGGGAATTTAAGGTC                       |            |
| R3_2_3_C2 | ACCGAAGAGCTACCAGACGAATTC                      |            |
| R3_2_D1   | TTGCCATGTTGAGTGAGAGC                          | This study |
| R3_2_D2   | GTGGTGGTGACCGTAAAATG                          |            |
| R3_2_R1   | CTATTGGTGTAAATTGGAACG                         |            |
| R3_2_R2   | CAGATGACCAAATTGGCTAC                          |            |
| R3_2_CP1  | TTGTCTCGAGGGAATTTAAGGTCAATAACTGCGTCTTGGTTCACC |            |
| R3_2_CP2  | CCGAAGAGCTACCAGACGAATTCAGAAATACCATCTTGGACTGA  |            |

**Region 3 N gene primer set 3**

|           |                                                |            |
|-----------|------------------------------------------------|------------|
| R3_3_F1   | CGATCAAAACAACGTCGGCC                           |            |
| R3_3_F2   | TCTGGCCAGTTCCTAGGTA                            |            |
| R3_3_C1   | TTGTCTCGAGGGAATTTAAGGTCTT                      |            |
| R3_2_3_C2 | ACCGAAGAGCTACCAGACGAATTC                       |            |
| R3_3_D1   | CTTGCCATGTTGAGTGAGAGC                          | This study |
| R3_3_D2   | GTGGTGGTGACCGTAAAATGAA                         |            |
| R3_3_R1   | CTATTGGTGTAAATTGGAACGCC                        |            |
| R3_3_R2   | TCCAGATGACCAAATTGGCTAC                         |            |
| R3_3_CP1  | TTCTCGAGGGAATTTAAGGTCTTCAATAAATACTGCGTCTTGGTTT |            |
| R3_3_CP2  | CGAAGAGCTACCAGACGAATTCAGAAATACCATCTTGGACTGA    |            |

| <b>Region 3 N gene primer set 4</b> |                                             |            |
|-------------------------------------|---------------------------------------------|------------|
| R3_4_F1                             | GCAGTAACCAGAATGGAGAAC                       |            |
| R3_4_F2                             | TTCTGGCCCAGTTCCTAGGTA                       |            |
| R3_4_C1                             | CTTGCCATGTTGAGTGAGAGCGGT                    |            |
| R3_4_C2                             | CAAATTGGCTACTACCGAAGAGCTAC                  |            |
| R3_4_D1                             | GAACCAAGACGCAGTATTATTG                      | This study |
| R3_4_D2                             | AATTCGTGGTGGTGACGGTAA                       |            |
| R3_4_R1                             | TCCTCGAGGGAATTTAAGGTCT                      |            |
| R3_4_R2                             | AAGGCGTTCCAATTAACACCAATA                    |            |
| R3_4_CP1                            | CTTGCCATGTTGAGTGAGAGCGGTCAAAACAACGTGGCCCCAA |            |
| R3_4_CP2                            | ATTGGCTACTACCGAAGAGCTACTAGAAATACCATCTGGACTG |            |

  

| <b>LAMP primer name</b>           | <b>Sequence 5' --&gt; 3'</b>               |                                                                                                        |
|-----------------------------------|--------------------------------------------|--------------------------------------------------------------------------------------------------------|
| <b>Region 1 ORF1ab primer set</b> |                                            |                                                                                                        |
| ORF1a-A-F3                        | CTGCACCTCATGGTCATGTT                       |                                                                                                        |
| ORF1a-A-B3                        | AGCTCGTCGCCTAAGTCAA                        |                                                                                                        |
| ORF1a-A-FIP                       | GAGGGACAAGGACACCAAGTGTATGGTTGAGCTGGTAGCAGA | Zhang et al. 2020 Rapid Molecular Detection of SARS-CoV-2 (COVID-19) Virus RNA Using Colorimetric LAMP |
| ORF1a-A-BIP                       | CCAGTGGCTTACCGCAAGGTTTTAGATCGGCGCCGTAAC    |                                                                                                        |
| ORF1a-A-LF                        | CCGTAAGAACGGTAATAAAGGAGC                   |                                                                                                        |
| ORF1a-A-LB                        | TTCGTAAGAACGGTAATAAAGGAGC                  |                                                                                                        |

  

| <b>Region 3 N gene primer set</b> |                                           |                                                                                                        |
|-----------------------------------|-------------------------------------------|--------------------------------------------------------------------------------------------------------|
| GeneN-A-F3                        | TGGCTACTACCGAAGAGCT                       |                                                                                                        |
| GeneN-A-B3                        | TGCAGCATTGTTAGCAGGAT                      |                                                                                                        |
| GeneN-A-FIP                       | TCTGGCCCAGTTCCTAGGTAGTCCAGACGAATTCGTGGTGG | Zhang et al. 2020 Rapid Molecular Detection of SARS-CoV-2 (COVID-19) Virus RNA Using Colorimetric LAMP |
| GeneN-A-BIP                       | AGACGGCATCATATGGGTTGCACGGGTGCCAATGTGATCT  |                                                                                                        |
| GeneN-A-LF                        | GGACTGAGATCTTTCATTTACCGT                  |                                                                                                        |
| GeneN-A-LB                        | ACTGAGGGAGCCTTGAATACA                     |                                                                                                        |

  

| <b>rt-PCR primer name</b>         | <b>Sequence 5' --&gt; 3'</b> |                                                                                                                         |
|-----------------------------------|------------------------------|-------------------------------------------------------------------------------------------------------------------------|
| <b>Region 3 N gene primer set</b> |                              |                                                                                                                         |
| WH-NIC N-F                        | CGTTTGGTGGACCCTCAGAT         | WHO Molecular assays to diagnose COVID-19: Summary table of available protocols- National Institute of Health, Thailand |
| WH-NIC N-R                        | CCCCACTGCGTTCTCCATT          |                                                                                                                         |
| WH-NIC N-P                        | FAM-CAACTGGCAGTAACCA- BHQ1   |                                                                                                                         |

**Supplementary Table 2:** List of synthesised gene fragments used as DNA/RNA template for MCDA, LAMP and rt-PCR. Blue indicates universal M13 adapters while red depicts the sequence for T7 promoter.

| Gene fragment name | Position in NC 045512.2 | Gene target | Sequence 5' -> 3'                                                                                                                                                                                                                                                                                                                                                                                                                                                                                                                                                                                                                                                             |
|--------------------|-------------------------|-------------|-------------------------------------------------------------------------------------------------------------------------------------------------------------------------------------------------------------------------------------------------------------------------------------------------------------------------------------------------------------------------------------------------------------------------------------------------------------------------------------------------------------------------------------------------------------------------------------------------------------------------------------------------------------------------------|
| Region 1           | 416-931                 | ORF1ab      | TGTA <sup>BLUE</sup> AAACGACGGCCAGT <sup>RED</sup> TAATACGACTCACTATAGTGTGGCTTAGTAGAAGTTGAAAAGGCGTTTTG<br>CCTCAACTTGAACAGCCCTATGTGTTTCATCAAAACGTTCCGGATGCTCGAAGTGCACCTCATGGTCAATGTTA<br>TGGTTGAGCTGGTAGCAGAAGCTCGAAGGCATTCAGTACGGTCTAGTGGTGAGACACTTGGTGTCTTTG<br>TCCTCATGTGGGCGAAATACCAAGTGGTTACCGCAAGGTTCTTCTCGTAAGAACGGTAATAAAGGAG<br>CTGGTGGCCATAGTTACGGCGCCGATCTAAAGTCAATTTGACTTAGGCGACGAGCTTGGCACTGATCCTT<br>ATGAAGATTTCAAGAAAACCTGGAACACTAAACATAGCAGTGGTGTACCCGTGAACTCATGCGTGAGC<br>TTAACGGAGGGGCATACACTCGTATGTCGATAACAACCTTCTGTGGCCCTGATGGCTACCCTCTTGAGT<br>GCATTAAGACCTTCTAGCACGTGCTGGTAAAGCTTCAATGCACTTTGTCCGAACAACCTGGACTTTATTG<br><sup>BLUE</sup> GTCATAGCTGTTTCCTG |
| Region 2           | 12869-13388             | ORF1ab      | TGTA <sup>BLUE</sup> AAACGACGGCCAGT <sup>RED</sup> TAATACGACTCACTATAGACTGGTACTATCTATACAGAAGTGAACACCT<br>TGTAGGTTTTGTACAGACACACCTAAAGGTCCTAAAGTGAAGTATTTATACTTTATTAAGGATTAAC<br>AACTAAATAGAGGTATGGTACTTGGTAGTTTAGCTGCCACAGTACGTCTACAAGCTGGTAATGCAACA<br>GAAGTGCCTGCCAATCAACTGTATTATCTTCTGTGCTTTTGTGTAGATGCTGCTAAAGCTTACAAG<br>ATTATCTAGCTAGTGGGGGACAACCAATCACTAATTGTGTAAAGATGTTGTGTACACACACTGGTACTG<br>GTCAGGCAATAACAGTTACACCGGAAGCCAATATGGATCAAGAATCCTTTGGTGGTGCATCGTGTGTC<br>TGTACTGCCGTTGCCACATAGATCATCCAAATCCTAAAGGATTTGTGACTTAAAGGTAAGTATGTAC<br>AAATACCTACAACCTTGTGCTAATGACCCTGTGGGTTTACACTTAAAAACACAGTCTGTACCCTGTGG<br><sup>BLUE</sup> GTAGGTCATAGCTGTTTCCTG            |
| Region 3           | 28246-28747             | N           | TGTA <sup>BLUE</sup> AAACGACGGCCAGT <sup>RED</sup> TAATACGACTCACTATAGTAGATTTCATCTAAACGAACAACTAAAAATGC<br>TGATAATGGACCCAAAATCAGCGAAATGCACCCCGCATTACGTTTGGTGGACCCCTCAGATTCAACTGG<br>CAGTAACCCAGAATGGAGAACGCAAGTGGGGCGCATCAAAACAACGTCGGCCCAAGGTTTACCCAATA<br>ATACTGCTCTTGTGTTACCGCTCTCACTCAACATGGCAAGGAAGACCTTAAATTCCTCGAGGACAAG<br>CGGTTCCAATTAACCAATAGCAGTCCAGATGACCAAAATGGCTACTACCGAAGAGCTACCAGACGA<br>ATTCGTGGTGGTACGGTAAAATGAAAGATTCAGTCCAAGATGGTATTTCTACTACCTAGGAACTGGG<br>CCAGAAGCTGGACTTCCCTATGGTGCTAACAAGACGGCATCATATGGGTTGCAACTGAGGGAGCCTT<br>GAATACACAAAAGATCACATTGGCACCCGCAATCCTGTAACAATGCTGCAATCGTGGT <sup>BLUE</sup> CATAGCTG<br><sup>BLUE</sup> TTTCCTG           |

BLUE = universal M13

RED = T7 promoter
